# Supplementary material for: Altered Expression and Splicing of ESRP1 in Malignant Melanoma Correlates with Epithelial–Mesenchymal Status and Tumor-Associated Immune Cytolytic Activity
Source: Oxford University Press journal article supplement (doi:10.1158/2326-6066.cir-15-0255), 2016-04-04
Supplement: 23266066cir150255-sup-156807_2_supp_3376186_334v31.doc [file 23266066cir150255-sup-156807_2_supp_3376186_334v31.doc]

**SUPPLEMENTAL FIGURE LEGEND**

**Figure S1.** The truncated *ESRP1* is only detected in melanoma. (A), Expression of *ESRP1* in TCGA. Top panel: *ESRP1* expression level in 24 primary tumor samples (dark bar) and their corresponding controls (white bar). *ESRP1* is highly expressed in carcinomas as well as in skin cutaneous melanoma (SKCM). Bottom panel: the truncated *ESRP1* as measured by the truncation ratio is only seen in SKCM. (B), Survey of *ESRP1* gene expression level in 1,000 cancer cell lines.

**Figure S2**. Estimation of keratinocyte contamination using *KRT2* and *LOR* expression. (A) Boxplots of *KRT2* and *LOR* gene expression in different normal tissues. Right panel: scatter plot of *KRT2* and *LOR* expression showing a good correlation of two genes. (B) Same figure as Figure 2A after removing keratinocyte-contaminated samples.

**Figure S3.** Conservation of E-box motif in intron 12 of *ESRP1* among mammals. Alignment of chr8: 95690370 – 95690381 among available genomic sequences of mammals.
