# Supplementary material for: Altered Expression and Splicing of ESRP1 in Malignant Melanoma Correlates with Epithelial–Mesenchymal Status and Tumor-Associated Immune Cytolytic Activity
Source: Oxford University Press journal article supplement (doi:10.1158/2326-6066.cir-15-0255), 2016-04-04
Supplement: 23266066cir150255-sup-156807_2_supp_3379927_f3bkx4.xlsx [file 23266066cir150255-sup-156807_2_supp_3379927_f3bkx4.xlsx]

## Sheet: figure.1.corr.cytolytic.cutoff.
tumor ID	tumor	sample size	correlation	p value
PAAD	pancreatic	179	-0.446	3.84507e-10
COAD	colon	286	-0.401	1.79886e-12
BLAD	bladder	408	-0.365	2.76787e-14
THCA	thyroid	513	-0.325	4.29871e-14
LUSC	lung squamous	501	-0.309	1.48264e-12
UCEC	endometrial	176	-0.26	0.00049673
STAD	stomach	415	-0.254	1.56546e-07
HNSC	head and neck	522	-0.251	5.80498e-09
SARC	sarcoma	260	-0.248	5.23537e-05
ESCA	esophageal	185	-0.242	0.000913583
SKCM	melanoma	471	-0.242	1.00572e-07
CESC	cervical	306	-0.235	3.20662e-05
LUAD	lung adenocarcinoma	515	-0.224	2.67865e-07
PRAD	prostate	498	-0.196	1.07348e-05
BRCA_TNBC	breast	202	-0.26	0.00023
BRCA_none-TNBC	breast	900	-0.25	3.5e-14
KIRC	renal clear cell	533	-0.137	0.00154525
GBM	glioblastoma	154	-0.094	0.246191
LGG	low grade glioma	516	-0.047	0.289413
KIRP	renal papillary	290	-0.013	0.83196
OV	ovarian	304	0.052	0.363952
LIHC	liver	371	0.089	0.0880744
TCGT	testis	150	0.108	0.186983
THYM	thymoma	120	0.144	0.117627
LAML	leukemia	173	0.227	0.00265963
